# Supplementary material for: Antimicrobial Properties of Different Hop (Humulus lupulus) Genotypes
Source: MDPI journal article supplement (doi:10.3390/plants12010120), 2022-12-26

# Plants

## Supplementary Material

### Antimicrobial Properties of Different Hop (*Humulus lupulus*) Genotypes

*Zala Kolenc<sup>1</sup>, Tomaž Langerholc<sup>2</sup>, Gregor Hostnik<sup>1</sup>, Miha Ocvirk<sup>3</sup>, Sara Štumpf<sup>1</sup>, Maša Pintarič<sup>2</sup>, Iztok Jože Košir<sup>3</sup>, Andreja Čerenak<sup>3</sup>, Alenka Garmut<sup>2</sup> and Urban Bren<sup>1,4,5\*</sup>*

<sup>1</sup> Laboratory of Physical Chemistry and Chemical Thermodynamics, Faculty of Chemistry and Chemical Technology, University of Maribor, Smetanova ulica 17, SI-2000 Maribor

<sup>2</sup> Department of Microbiology, Biochemistry, Molecular Biology and Biotechnology, Faculty of Agriculture and Life Sciences, University of Maribor, Pivola 10, 2311 Hoče, Slovenia

<sup>3</sup> Department for Agrochemistry and Brewing; Department for Plants, Soil and the Environment, Slovenian Institute of Hop Research and Brewing, Cesta Žalskega tabora 2, 3310 Žalec, Slovenia

<sup>4</sup> Department of Applied Natural Sciences, Faculty of Mathematics, Natural Sciences and Information Technologies, University of Primorska, Glagoljaška ulica 8, SI-6000 Koper, Slovenia

<sup>5</sup> Institute of Environmental Protection and Sensors, Beloruska ulica 7, SI-2000 Maribor, Slovenia

\* Corresponding Author

**E-mail address:** urban.bren@um.si

**tel.:** +386-2-229-4421.

Additional xanthohumol identity confirmation of compound was obtained using <sup>1</sup>H NMR and LC/MS spectroscopy. <sup>1</sup>H spectrum (300 MHz, (CD<sub>3</sub>)<sub>2</sub>SO, d/ppm, J/Hz) δ = 14.60 (1H, s, 2'-OH), 10.55 (1H, s, 4-OH), 10.02 (1H, s, 4'-OH), 7.74 (1H, d, J = 15.5 Hz, H<sub>α</sub> C=O), 7.64 (1H, d, J = 15.6 Hz, H<sub>β</sub> C=O), 7.55 (2H, d, J = 8.6 Hz, H-2, H-6), 6.82 (2H, d, J = 8.6 Hz, H-3, H-5), 6.06 (1H, s, H-5'), 5.11 (1H, t, J = 7.1 Hz, H-2''), 3.85 (3H, s, O-Me), 3.12 (2H, d, J = 7.0 Hz, H-1''), 1.68 (3H, s, H-4''), 1.59 (3H, s, H-5'').

**Figure S1:** Comparison of the experimental data and the model curve of  $\ln(OD_{595}/OD_{595,0})$  of *Staphylococcus aureus* inoculated in **100 % MHB** medium for the **HAE Styrian Eagle** extract. In figure the growth curve for A) control sample, B) sample concentration of 3.69 µg/mL, C) sample concentration of 7.80 µg/mL, D) sample concentration of 15.60 µg/mL are presented.

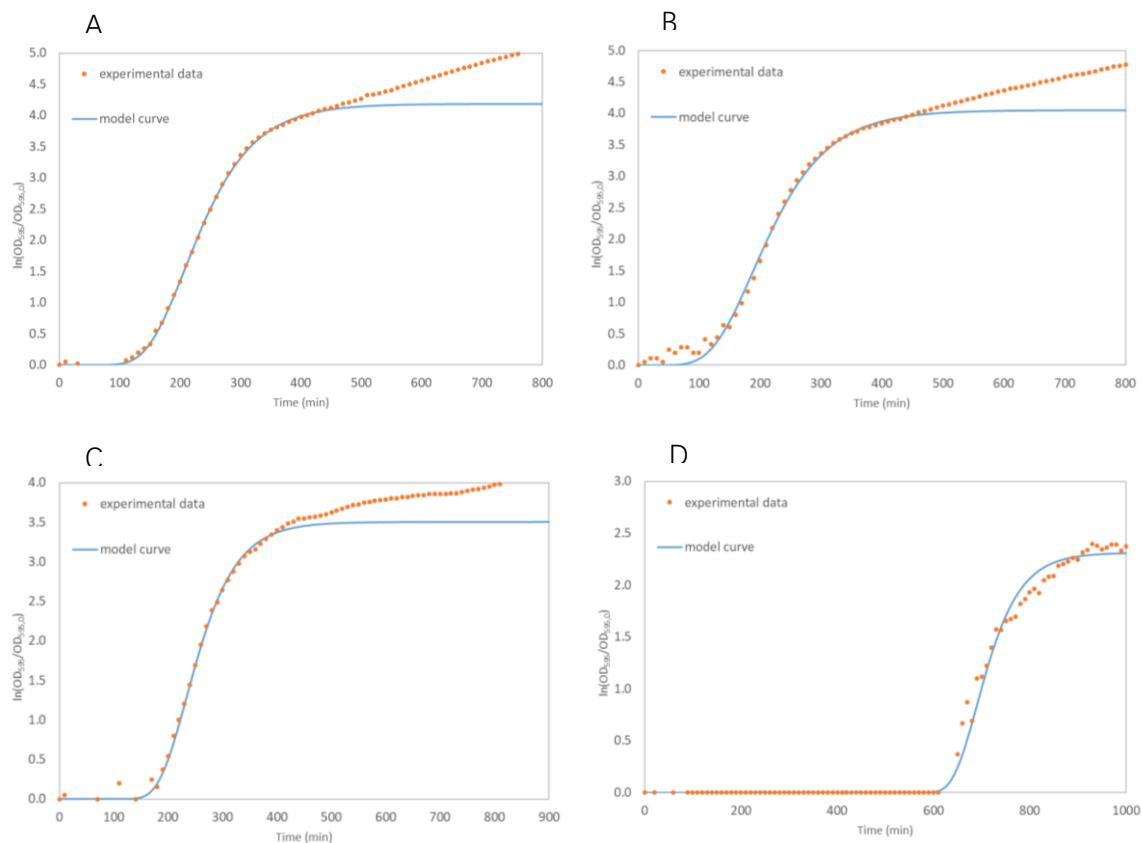

**Figure S2:** Comparison of the experimental data and the model curve of  $\ln(OD_{595}/OD_{595,0})$  of *Staphylococcus aureus* inoculated in **100 % MHB medium** for the  $\alpha\beta$  – AF extract. In figure the growth curve for A) control sample, B) sample concentration of 4.40  $\mu\text{g/mL}$ , C) sample concentration of 6.58  $\mu\text{g/mL}$ , D) sample concentration of 9.88  $\mu\text{g/mL}$ , E) sample concentration of 14.80  $\mu\text{g/mL}$ , F) sample concentration of 22.20  $\mu\text{g/mL}$  are presented.

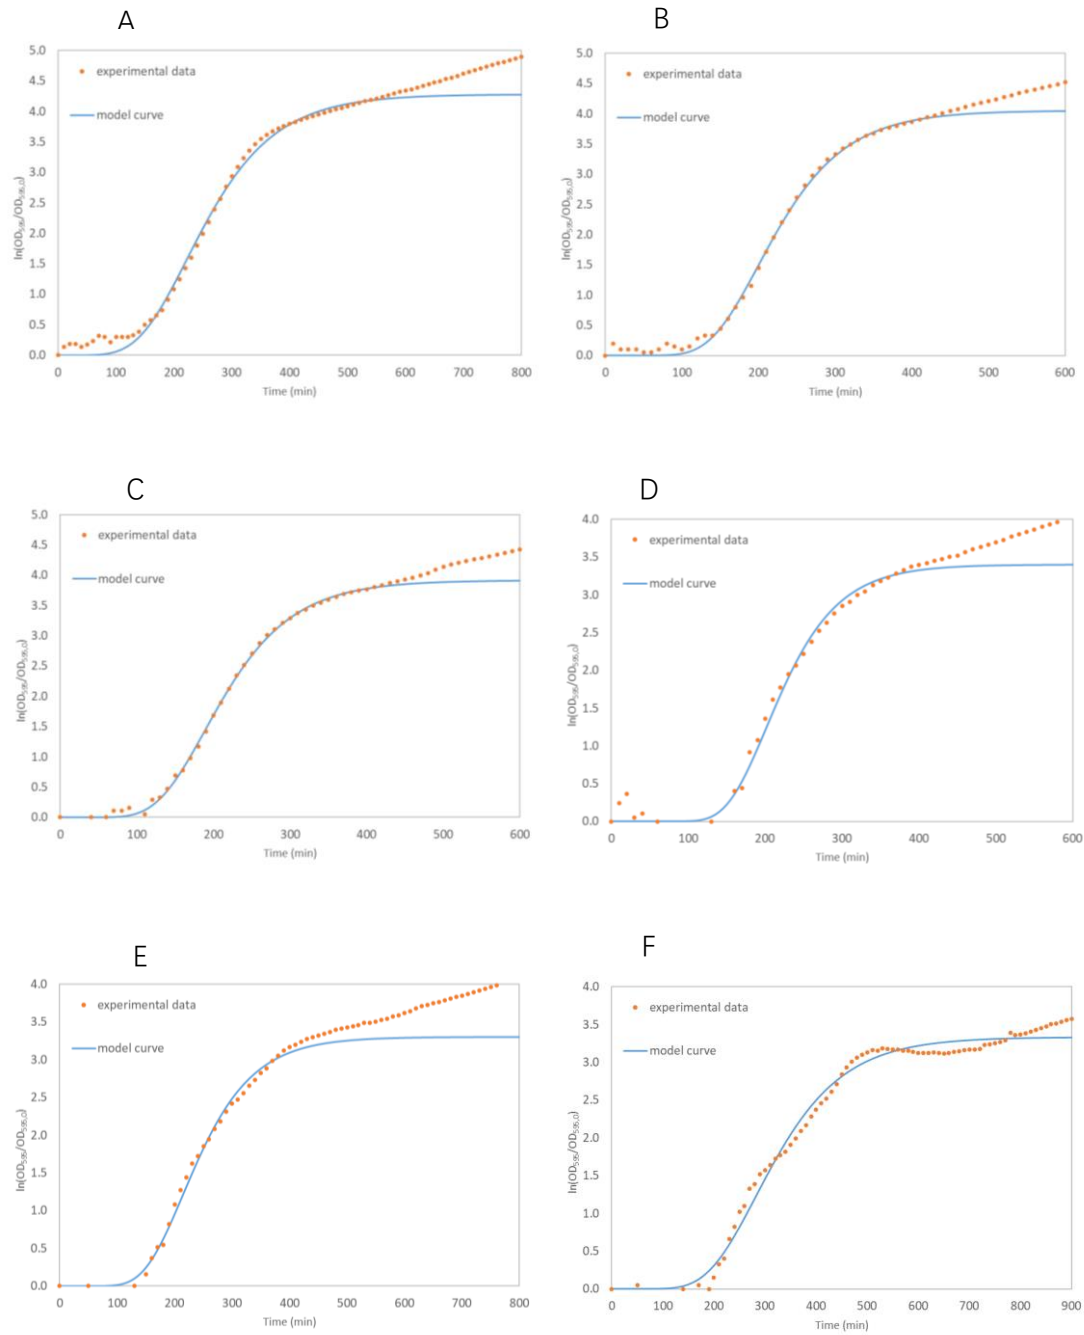

**Figure S3:** Comparison of the experimental data and the model curve of  $\ln(OD_{595}/OD_{595,0})$  of *Staphylococcus aureus* inoculated in **100 % MHB medium for the  $\beta$  – AF extract**. In figure the growth curve for A) control sample, B) sample concentration of 1.76  $\mu\text{g/mL}$ , C) sample concentration of 2.63  $\mu\text{g/mL}$ , D) sample concentration of 3.95  $\mu\text{g/mL}$ , E) sample concentration of 5.93  $\mu\text{g/mL}$  are presented.

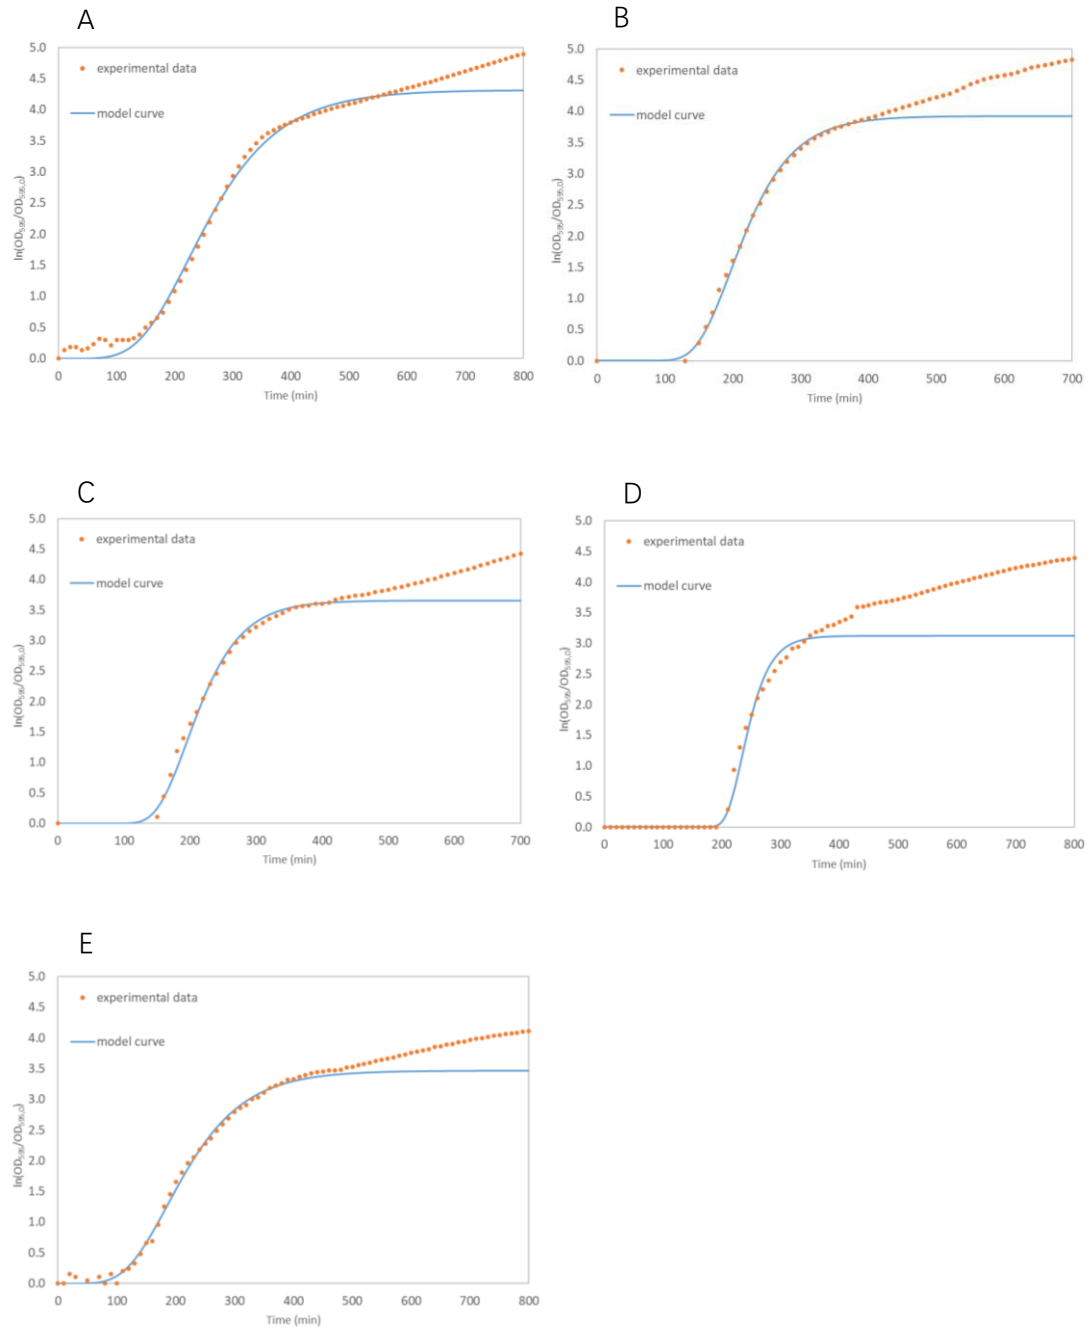

Supplement: s1 [file s1]
